# Supplementary material for: Tribromide ion immobilized on magnetic nanoparticle as a new, efficient and reusable nanocatalyst in multicomponent reactions
Source: Royal Society of Chemistry journal article supplement (doi:10.1039/c6ra15474c), 2016-01-01

## Supporting Information

### **Tribromide ion immobilized on magnetic nanoparticle as new, efficient and reusable nanocatalyst in multicomponent reactions**

Maryam Hajjami\* and Fatemeh Gholamian

Department of Chemistry, Faculty of Science, Ilam University, Ilam, Iran; e-mail address:  
mhajjami@yahoo.com

## The synthesis of 2,3 dihydroquinazolin-4(1H)-ones derivatives and compounds characterization data

A stirred mixture of 4-chlorobenzaldehyde (1 mmol, 0.140 g), 2-aminobenzamide (1.05 mmol, 0.1429 g) and MNPs-TEDETA tribromide (0.05 g), was reacted in reflux of ethanol. After completion of the reaction, monitored by TLC, the product was dissolved in hot ethanol, and then catalyst was separated from the product by an external magnet. Then ethanol was removed by evaporation. Finally, 0.245 g (0.9496 mmol) of corresponding pure product was obtained by recrystallization by EtOH. The yield of the product was obtained 95%.

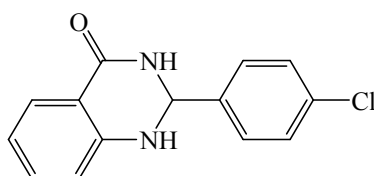

**2-(4-Chlorophenyl)-2,3-dihydroquinazolin-4(1H)-one (entry 1, Table 2) (1a).**  $^1\text{H}$  NMR (400 MHz,  $\text{DMSO-d}_6$ ):  $\delta_{\text{H}}$ : 8.29 (s, 1H), 7.60–7.41 (m, 5H), 7.25–7.20 (t,  $J=7.5$ , 1H), 7.12 (s, 1H), 6.75–6.63 (m, 2H), 5.75 (s, 1H) ppm.

A stirred mixture of 3,4-dimethoxybenzaldehyde (1 mmol, 0.166 g), 2-aminobenzamide (1.05 mmol, 0.1429 g) and MNPs-TEDETA tribromide (0.05 g), was reacted in reflux of ethanol. After completion of the reaction, monitored by TLC, the product was dissolved in hot ethanol, and then catalyst was separated from the product by an external magnet. Then ethanol was removed by evaporation. Finally, 0.281 g (0.9894 mmol) of corresponding pure product was obtained by recrystallization by EtOH. The yield of the product was obtained 99%.

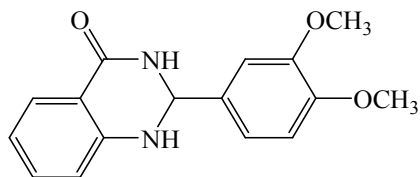

**2-(3,4-Dimethoxyphenyl)-2,3-dihydroquinazolin-4(1H)-one (entry 2, Table 2) (1b).**  $^1\text{H}$  NMR (400 MHz,  $\text{DMSO-d}_6$ ):  $\delta_{\text{H}}$  : 8.21 (s, 1H), 7.64–7.61 (d,  $J=1.6$ , 1H), 7.29–7.25 (t,  $J=8$ , 1H), 7.15- 7.14 (d,  $J=1.6$ , 1H), 7.03–6.97 (m, 2H), 6.95 (s, 1H), 6.78–6.76 (d,  $J=8$ , 1H), 6.72–6.68 (t,  $J=1.2$ , 1H), 5.71 (s, 1H), 3.77 (s, 3H), 3.76 (s, 3H) ppm.

A stirred mixture of 4-methoxybenzaldehyde (1 mmol, 0.136 g), 2-aminobenzamide (1.05 mmol, 0.1429 g) and MNPs-TEDETA tribromide (0.05 g), was reacted in reflux of ethanol. After completion of the reaction, monitored by TLC, the product was dissolved in hot ethanol, and then catalyst was separated from the product by an external magnet. Then ethanol was removed by evaporation. Finally, 0.1778 g (0.7 mmol) of corresponding pure product was obtained by recrystallization by EtOH. The yield of the product was obtained 70%.

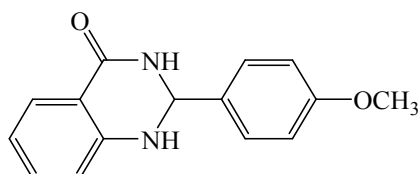

**2-(4-Methoxyphenyl)-2,3-dihydroquinazolin-4(1H)-one (entry 3, Table 2) (1c).**  $^1\text{H}$  NMR (400 MHz, DMSO- $d_6$ ):  $\delta_{\text{H}}$  : 8.22 (s, 1H), 7.66–7.63 (m, 1H), 7.46–7.44 (d,  $J = 8.8$ , 2H), 7.29–7.24 (m, 1H), 7.04 (s, 1H), 6.99–6.69 (d,  $J=1.2$ , 2H), 6.78–6.76 (d,  $J = 8$ , 1H), 6.70–6.68 (t,  $J= 7.2$ , 1H), 5.74 (s, 1H), 3.77 (s, 3H) ppm.

A stirred mixture of 4-ethoxybenzaldehyde (1 mmol, 0.150 g), 2-aminobenzamide (1.05 mmol, 0.1429 g) and MNPs-TEDETA tribromide (0.05 g), was reacted in reflux of ethanol. After completion of the reaction, monitored by TLC, the product was dissolved in hot ethanol, and then catalyst was separated from the product by an external magnet. Then ethanol was removed by evaporation. Finally, 0.247 g (0.9216 mmol) of corresponding pure product was obtained by recrystallization by EtOH. The yield of the product was obtained 92%.

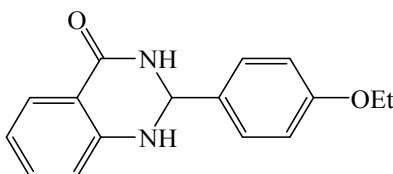

**2-(4-Ethoxyphenyl)-2,3-dihydroquinazolin-4(1H)-one (entry 4, Table 2) (1d).**  $^1\text{H}$  NMR (400 MHz, DMSO- $d_6$ ):  $\delta_{\text{H}}$  : 7.95–7.94 (b, 1H), 7.51–7.50 (m, 2H), 7.34 (s, 1H), 7.27 (s, 1H), 6.94–6.90 (m, 3H), 6.68–6.67 (m, 1H), 5.85 (s, 1H), 5.75 (s, 1H), 4.08–4.06 (q,  $J \frac{1}{4} 4$ , 2H), 1.46–1.44 (s, 3H) ppm.

A stirred mixture of 4-fluorobenzaldehyde (1 mmol, 0.124 g), 2-aminobenzamide (1.05 mmol, 0.1429 g) and MNPs-TEDETA tribromide (0.05 g), was reacted in reflux of ethanol. After completion of the reaction, monitored by TLC, the product was dissolved in hot ethanol, and then catalyst was separated from the product by an external magnet. Then ethanol was removed by evaporation. Finally, 0.23 g (0.95 mmol) of corresponding pure product was obtained by recrystallization by EtOH. The yield of the product was obtained 95%.

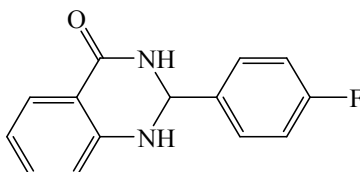

**2-(4-Fluorophenyl)-2,3-dihydroquinazolin-4(1H)-one (entry 5, Table 2) (1e).**  $^1\text{H}$  NMR (400 MHz, DMSO- $d_6$ ):  $\delta_{\text{H}}$  : 8.32 (s, 1H), 7.65–7.63 (m, 1H), 7.59–7.54 (m, 2H), 7.30–7.23 (m, 3H), 7.13 (s, 1H), 6.79–6.77 (d,  $J=0.8$ , 1H), 6.69–6.67 (t,  $J=8$ , 1H) 5.80 (s, 1H) ppm.

A stirred mixture of 4-bromobenzaldehyde (1 mmol, 0.185 g), 2-aminobenzamide (1.05 mmol, 0.1429 g) and MNPs-TEDETA tribromide (0.05 g), was reacted in reflux of ethanol. After completion of the reaction, monitored by TLC, the product was dissolved in hot ethanol, and then catalyst was separated from the product by an external magnet. Then ethanol was removed by evaporation. Finally, 0.248 g (0.8184 mmol) of corresponding pure product was obtained by recrystallization by EtOH. The yield of the product was obtained 82%.

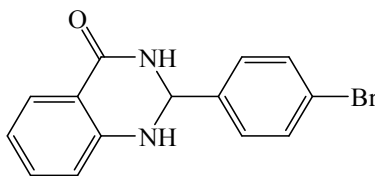

**2-(4-Bromophenyl)-2,3-dihydroquinazolin-4(1H)-one (entry 6, Table 2) (1f).**  $^1\text{H}$  NMR (400 MHz, DMSO- $d_6$ ):  $\delta_{\text{H}}$  : 8.17–8.14 (m, 1H), 7.79–7.77 (m, 1H), 7.63–7.59 (m, 3H), 7.48–7.45 (m, 2H), 7.29–7.23 (m, 1H), 6.77–6.72 (d,  $J = 19.2$ , 1H), 6.70–6.67 (m, 1H), 5.76 (s, 1H) ppm.

A stirred mixture of 4-methylbenzaldehyde (1 mmol, 0.1202 g), 2-aminobenzamide (1.05 mmol, 0.1429 g) and MNPs-TEDETA tribromide (0.05 g), was reacted in reflux of ethanol. After completion of the reaction, monitored by TLC, the product was dissolved in hot ethanol, and then catalyst was separated from the product by an external magnet. Then ethanol was removed

by evaporation. Finally, 0.2286 g (0.9596 mmol) of corresponding pure product was obtained by recrystallization by EtOH. The yield of the product was obtained 96%.

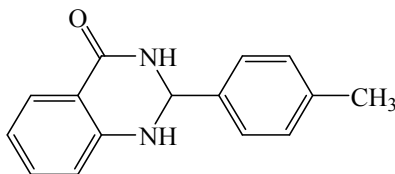

**2-(4-Methylphenyl)-2,3-dihydroquinazolin-4(1H)-one (entry 7, Table 2) (1g).**  $^1\text{H}$  NMR (400 MHz, DMSO- $d_6$ ):  $\delta_{\text{H}}$  : 8.21 (s, 1H), 7.63–7.60 (d,  $J = 7.5$ , 1H), 7.38–7.35 (d,  $J = 7.5$ , 2H), 7.25–7.13 (m, 3H), 7.03 (s, 1H), 6.74–6.63 (m, 2H), 5.71 (s, 1H), 2.49–2.42 (s, 3H) ppm.

A stirred mixture of 2-nitrobenzaldehyde (1 mmol, 0.151 g), 2-aminobenzamide (1.05 mmol, 0.1429 g) and MNPs-TEDETA tribromide (0.05 g), was reacted in reflux of ethanol. After completion of the reaction, monitored by TLC, the product was dissolved in hot ethanol, and then catalyst was separated from the product by an external magnet. Then ethanol was removed by evaporation. Finally, 0.215 g (0.7992 mmol) of corresponding pure product was obtained by recrystallization by EtOH. The yield of the product was obtained 80%.

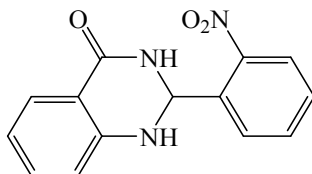

**2-(2-Nitrophenyl)-2,3-dihydroquinazolin-4(1H)-one (entry 8, Table 2) (1h).**  $^1\text{H}$  NMR (400 MHz, DMSO- $d_6$ ):  $\delta_{\text{H}}$  : 8.25 (s, 1H), 8.10–8.08 (d,  $J = 8$ , 1H), 7.90–7.87 (d,  $J = 8$ , 1H), 7.83–7.79 (t,  $J = 0.8$ , 1H), 7.69–7.63 (m, 2H), 7.30–7.26 (m, 1H), 7.04 (s, 1H), 6.81 (d,  $J = 1.2$ , 1H), 6.77–6.72 (m, 1H), 6.36 (m, 1H) ppm.

A stirred mixture of 3-nitrobenzaldehyde (1 mmol, 0.151 g), 2-aminobenzamide (1.05 mmol, 0.1429 g) and MNPs-TEDETA tribromide (0.05 g), was reacted in reflux of ethanol. After completion of the reaction, monitored by TLC, the product was dissolved in hot ethanol, and then catalyst was separated from the product by an external magnet. Then ethanol was removed by evaporation. Finally, 0.266 g (0.9888 mmol) of corresponding pure product was obtained by recrystallization by EtOH. The yield of the product was obtained 99%.

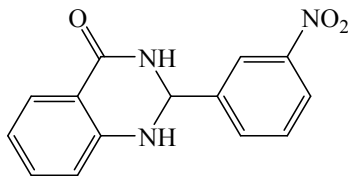

**2-(3-Nitrophenyl)-2,3-dihydroquinazolin-4(1H)-one (entry 9, Table 2) (1i).**  $^1\text{H}$  NMR (400 MHz,  $\text{DMSO-d}_6$ ):  $\delta_{\text{H}}$  : 8.57 (s, 1H), 8.40–8.39 (t,  $J=1.6$ , 1H), 8.24–8.21 (m, 2H), 7.98- 7.96 (d,  $J=7.6$ , 1H), 7.74-7.70 (t,  $J=8$ , 1H), 7.66-7.64 (m, 1H), 7.38 (s, 1H), 7.32-7.28 (m, 1H), 6.83-6.81 (d,  $J=8$ , 1H), 6.74-6.70 (m, 1H), 5.98 (s, 1H) ppm.

### The synthesis of polyhydroquinoline derivatives and compounds characterization data

A mixture of 4-chlorobenzaldehyde (1 mmol, 0.140 g), dimedon (1 mmol, 0.140 g), ethylacetoacetate (1 mmol, 0.130 g), ammonium acetate (1.2 mmol, 0.092 g) and MNPs-TEDETA tribromide (0.05 g) was stirred in PEG at 80 °C. The progress of the reaction was monitored by TLC. After completion of the reaction, catalyst was separated by an external magnet then product extracted with ethylacetate. Finally, the solvent was evaporated and product was recrystallized in ethanol, which the 0.343 g (0.9183 mmol) pure product was obtained in yield of 92%.

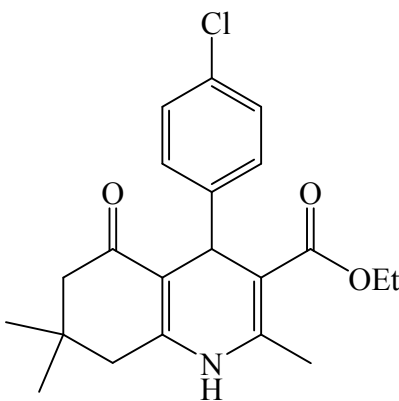

**Ethyl-4-(4-chlorophenyl)-2,7,7-trimethyl-5-oxo-1,4,5,6,7,8-hexahydroquinoline-3-carboxylate (entry 1, Table 4) (2a).**  $^1\text{H}$  NMR (400 MHz,  $\text{DMSO-d}_6$ ):  $\delta_{\text{H}}$  : 9.13 (s, 1H), 7.25–7.28 (m, 2H), 7.17–7.19 (m, 2H), 4.86 (s, 1H), 4.01–3.96 (q,  $J = 7.2$ , 2H), 2.46–2.41 (d,  $J = 16.8$ , 1H), 2.31–2.28 (m, 4H), 2.21–2.17 (d,  $J = 16$ , 1H), 2.01–1.97 (d,  $J = 16$ , 1H), 1.15–1.12 (t,  $J = 7.2$ , 3H), 1.02 (s, 3H), 0.85 (s, 3H) ppm.

A mixture of 4-bromobenzaldehyde (1 mmol, 0.185 g), dimedon (1 mmol, 0.140 g), ethylacetoacetate (1 mmol, 0.130 g), ammonium acetate (1.2 mmol, 0.092 g) and MNPs-TEDETA tribromide (0.05 g) was stirred in PEG at 80 °C. The progress of the reaction was monitored by TLC. After completion of the reaction, catalyst was separated by an external magnet then product extracted with ethylacetate. Finally, the solvent was evaporated and product was recrystallized in ethanol, which the 0.372 g (0.8899 mmol) pure product was obtained in yield of 89%.

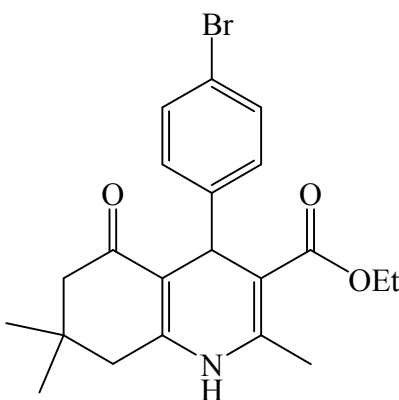

**Ethyl-4-(4-bromophenyl)-2,7,7-trimethyl-5-oxo-1,4,5,6,7,8-hexahydroquinoline-3-carboxylate (entry 2, Table 4) (2b).** <sup>1</sup>H NMR (400 MHz, DMSO-d<sub>6</sub>): δ<sub>H</sub> : 9.14 (s, 1H), 7.41–7.39 (d, J = 8.4, 2H), 7.13–7.11 (d, J = 8.4, 2H), 4.84 (s, 1H), 4.01–3.95 (q, J = 6.8, 2H), 2.52–2.46 (d, J = 26.4, 1H), 2.31–2.28 (m, 4H), 2.21–2.17 (d, J = 16, 1H), 2.01–1.97 (d, J = 16, 1H), 1.15–1.11 (t, J = 7.2, 3H), 1.02 (s, 3H), 0.84 (s, 3H) ppm.

A mixture of 4-methylbenzaldehyde (1 mmol, 0.1202 g), dimedon (1 mmol, 0.140 g), ethylacetoacetate (1 mmol, 0.130 g), ammonium acetate (1.2 mmol, 0.092 g) and MNPs-TEDETA tribromide (0.05 g) was stirred in PEG at 80 °C. The progress of the reaction was monitored by TLC. After completion of the reaction, catalyst was separated by an external magnet then product extracted with ethylacetate. Finally, the solvent was evaporated and product was recrystallized in ethanol, which the 0.3037 g (0.8598 mmol) pure product was obtained in yield of 86%.

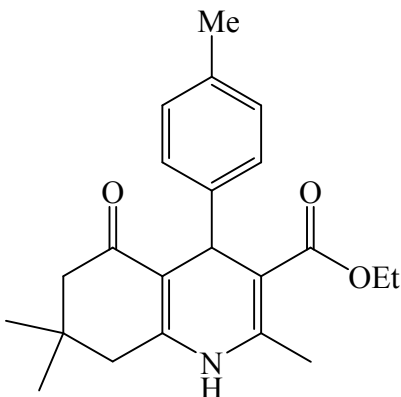

**Ethyl-4-(4-methylphenyl)-2,7,7-trimethyl-5-oxo-1,4,5,6,7,8-hexahydroquinoline-3-carboxylate (entry 3, Table 4) (2c).**  $^1\text{H}$  NMR (400 MHz, DMSO- $d_6$ ):  $\delta_{\text{H}}$  : 9.04 (s, 1H), 7.05–7.03 (d,  $J$  = 8, 2H), 7.00–6.97 (d,  $J$  = 8, 2H), 4.81 (s, 1H), 4.01–3.95 (q,  $J$  = 6.8, 2H), 2.44–2.40 (d,  $J$  = 16, 1H), 2.30–2.26 (m, 4H), 2.21–2.15 (m, 4H), 2.10–1.96 (d,  $J$  = 16, 1H), 1.17–1.13 (t,  $J$  = 6.8, 3H), 1.02 (s, 3H), 0.86 (s, 3H) ppm.

A mixture of 4-methoxybenzaldehyde (1 mmol, 0.136 g), dimedon (1 mmol, 0.140 g), ethylacetoacetate (1 mmol, 0.130 g), ammonium acetate (1.2 mmol, 0.092 g) and MNPs-TEDETA tribromide (0.05 g) was stirred in PEG at 80 °C. The progress of the reaction was monitored by TLC. After completion of the reaction, catalyst was separated by an external magnet then product extracted with ethylacetate. Finally, the solvent was evaporated and product was recrystallized in ethanol, which the 0.303 g (0.8211 mmol) pure product was obtained in yield of 82%.

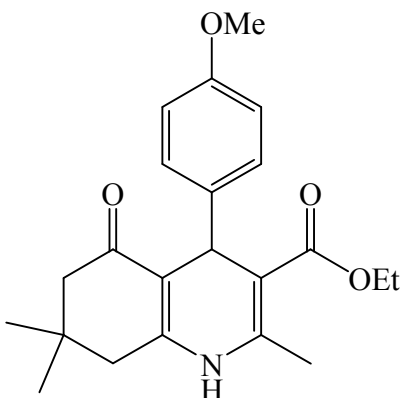

**Ethyl-4-(4-methoxyphenyl)-2,7,7-trimethyl-5-oxo-1,4,5,6,7,8-hexahydroquinoline-3-carboxylate (entry 5, Table 4) (2d).**  $^1\text{H}$  NMR (400 MHz, DMSO- $d_6$ ):  $\delta_{\text{H}}$  : 9.04 (s, 1H), 7.08–7.06 (d,  $J$  = 8.4, 2H), 6.77–6.75 (d,  $J$  = 8.4, 2H), 4.81 (s, 1H), 4.01–3.96 (q,  $J$  = 7.2, 2H), 3.68 (s,



3H), 2.45–2.41 (d, J = 29.2, 1H), 2.31–2.29 (m, 4H), 2.20–2.16 (d, J = 16, 1H), 2.01–1.97 (d, J = 16.4, 1H), 1.17–1.14 (t, J = 7.2, 3H), 1.02 (s, 3H), 0.87 (s, 3H) ppm.

A mixture of 3,4-dimethoxybenzaldehyde (1 mmol, 0.166 g), dimedon (1 mmol, 0.140 g), ethylacetoacetate (1 mmol, 0.130 g), ammonium acetate (1.2 mmol, 0.092 g) and MNPs-TEDETA tribromide (0.05 g) was stirred in PEG at 80 °C. The progress of the reaction was monitored by TLC. After completion of the reaction, catalyst was separated by an external magnet then product extracted with ethylacetate. Finally, the solvent was evaporated and product was recrystallized in ethanol, which the 0.36 g (0.9022 mmol) pure product was obtained in yield of 90%.

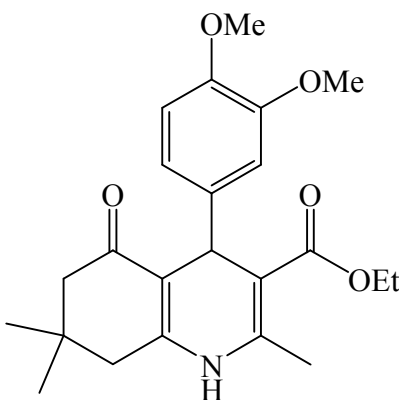

**Ethyl-4-(3,4-dimethoxyphenyl)-2,7,7-trimethyl-5-oxo-1,4,5,6,7,8-hexahydroquinoline-3-carboxylate (entry 6, Table 4) (2e).**  $^1\text{H}$  NMR (400 MHz, DMSO- $d_6$ ):  $\delta_{\text{H}}$  : 9.05 (s, 1H), 6.79–6.76 (m, 2H), 6.65–6.63 (d, J = 8, 1H), 4.81 (s, 1H), 4.04–3.99 (q, J = 7.2, 2H), 3.69–3.68 (d, J = 4.4, 5H), 2.47–2.42 (d, J = 17.2, 2H), 2.35–2.29 (m, 4H), 2.22–2.18 (d, J = 16, 1H), 2.03–1.99 (d, J = 16, 1H), 1.20–1.16 (t, J = 7.2, 3H), 1.03 (s, 3H), 0.90 (s, 3H) ppm.

A mixture of 4-hydroxybenzaldehyde (1 mmol, 0.1221 g), dimedon (1 mmol, 0.140 g), ethylacetoacetate (1 mmol, 0.130 g), ammonium acetate (1.2 mmol, 0.092 g) and MNPs-TEDETA tribromide (0.05 g) was stirred in PEG at 80 °C. The progress of the reaction was monitored by TLC. After completion of the reaction, catalyst was separated by an external magnet then product extracted with ethylacetate. Finally, the solvent was evaporated and product was recrystallized in ethanol, which the 0.284 g (0.7997 mmol) pure product was obtained in yield of 80%.

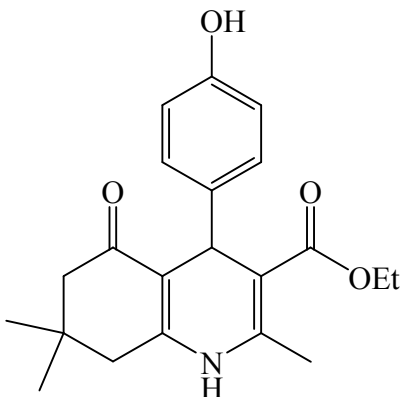

**Ethyl-4-(4-hydroxyphenyl)-2,7,7-trimethyl-5-oxo-1,4,5,6,7,8-hexahydroquinoline-3-carboxylate (entry 7, Table 4) (2f).**  $^1\text{H}$  NMR (400 MHz, DMSO- $d_6$ ):  $\delta_{\text{H}}$  : 9.05 (s, 1H), 8.99 (s, 1H), 6.95–6.93 (d,  $j=8.8$ , 2H), 6.58–6.55 (m, 2H), 4.75 (s, 1H), 4.02–3.98 (m, 2H), 2.44–2.40 (d,  $J = 16.8$ , 1H), 2.30–2.26 (m, 4H), 2.19–2.15 (d,  $J = 16$ , 1H), 2.00–1.96 (d,  $J = 16$ , 1H), 1.17–1.14 (t,  $J = 7.2$ , 3H), 1.02 (s, 3H), 0.87 (s, 3H) ppm.

A mixture of benzaldehyde (1 mmol, 0.106 g), dimedon (1 mmol, 0.140 g), ethylacetoacetate (1 mmol, 0.130 g), ammonium acetate (1.2 mmol, 0.092 g) and MNPs-TEDETA tribromide (0.05 g) was stirred in PEG at 80 °C. The progress of the reaction was monitored by TLC. After completion of the reaction, catalyst was separated by an external magnet then product extracted with ethylacetate. Finally, the solvent was evaporated and product was recrystallized in ethanol, which the 0.255 g (0.7522 mmol) pure product was obtained in yield of 75%.

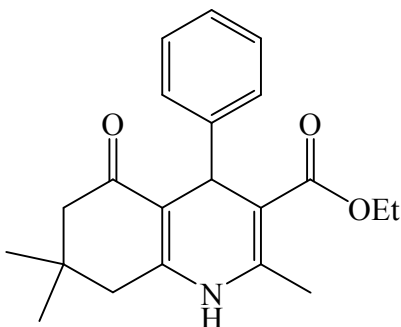

**Ethyl-4-(phenyl)-2,7,7-trimethyl-5-oxo-1,4,5,6,7,8 hexahydroquinoline-3-carboxylate (entry 8, Table 4) (2g).**  $^1\text{H}$  NMR (400 MHz, DMSO- $d_6$ ):  $\delta_{\text{H}}$  : 9.08 (s, 1H), 7.22–7.17 (m, 4H), 7.10–7.06 (m, 1H), 4.88 (s, 1H), 4.02–3.97 (q,  $J = 7.2$ , 2H), 2.46–2.42 (d,  $J = 17.2$  1H), 2.33–2.29 (t,  $J=8.8$ , 4H), 2.21–2.17 (d,  $J = 16$ , 1H), 2.02–1.98 (d,  $J = 16$ , 1H), 1.16–1.13 (t,  $J = 7.2$ , 3H), 1.03 (s, 3H), 0.86 (s, 3H) ppm.

A mixture of 4-fluorobenzaldehyde (1 mmol, 0.124 g), dimedon (1 mmol, 0.140 g), ethylacetoacetate (1 mmol, 0.130 g), ammonium acetate (1.2 mmol, 0.092 g) and MNPs-TEDETA tribromide (0.05 g) was stirred in PEG at 80 °C. The progress of the reaction was monitored by TLC. After completion of the reaction, catalyst was separated by an external magnet then product extracted with ethylacetate. Finally, the solvent was evaporated and product was recrystallized in ethanol, which the 0.31 g (0.8683 mmol) pure product was obtained in yield of 87%.

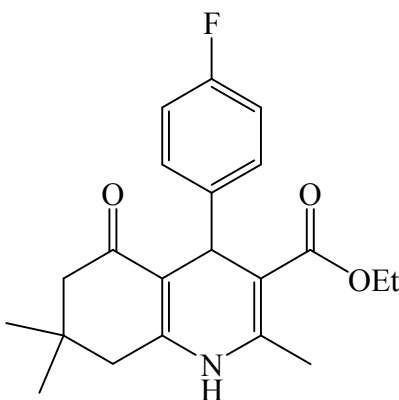

**Ethyl-4-(4-fluorophenyl)-2,7,7-trimethyl-5-oxo-1,4,5,6,7,8-hexahydroquinoline-3-carboxylate (entry 9, Table 4) (2h).** <sup>1</sup>H NMR (400 MHz, DMSO-d<sub>6</sub>): δ<sub>H</sub> : 9.11 (s, 1H), 7.20–7.17 (m, 2H), 7.04–7.00 (t, J = 8.8, 2H), 4.87 (s, 1H), 4.02–3.96 (q, J = 7.2, 2H), 2.46–2.41 (d, J = 16.8, 1H), 2.32–2.28 (m, 4H), 2.21–2.17 (d, J = 16, 1H), 2.02–1.98 (d, J = 16, 1H), 1.15–1.12 (t, J = 7.2, 3H), 1.02 (s, 3H), 0.85 (s, 3H) ppm.

A mixture of 3-nitrobenzaldehyde (1 mmol, 0.151 g), dimedon (1 mmol, 0.140 g), ethylacetoacetate (1 mmol, 0.130 g), ammonium acetate (1.2 mmol, 0.092 g) and MNPs-TEDETA tribromide (0.05 g) was stirred in PEG at 80 °C. The progress of the reaction was monitored by TLC. After completion of the reaction, catalyst was separated by an external magnet then product extracted with ethylacetate. Finally, the solvent was evaporated and product was recrystallized in ethanol, which the 0.33 g (0.8593 mmol) pure product was obtained in yield of 86%.

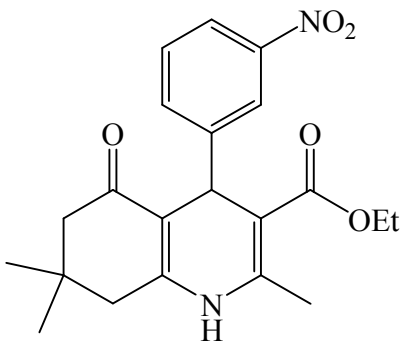

**Ethyl-4-(3-nitrophenyl)-2,7,7-trimethyl-5-oxo-1,4,5,6,7,8-hexahydroquinoline-3-carboxylate (entry 10, Table 4) (2i).** <sup>1</sup>H NMR (400 MHz, DMSO-d<sub>6</sub>): δ<sub>H</sub> : 9.25 (s, 1H), 8.12–8.10 (d, J = 8.4, 2H), 7.45–7.43 (d, J = 8.4, 2H), 4.99 (s, 1H), 4.01–3.95 (q, J = 7.2, 2H), 2.48–2.44 (d, J = 17.2, 1H), 2.34–2.30 (d, J = 16.8, 4H), 2.22–2.18 (d, J = 16, 1H), 2.02–1.98 (d, J = 16, 1H), 1.14–1.11 (t, J = 7.2, 3H), 1.02 (s, 3H), 0.84 (s, 3H) ppm.

<sup>1</sup>H NMR 1a

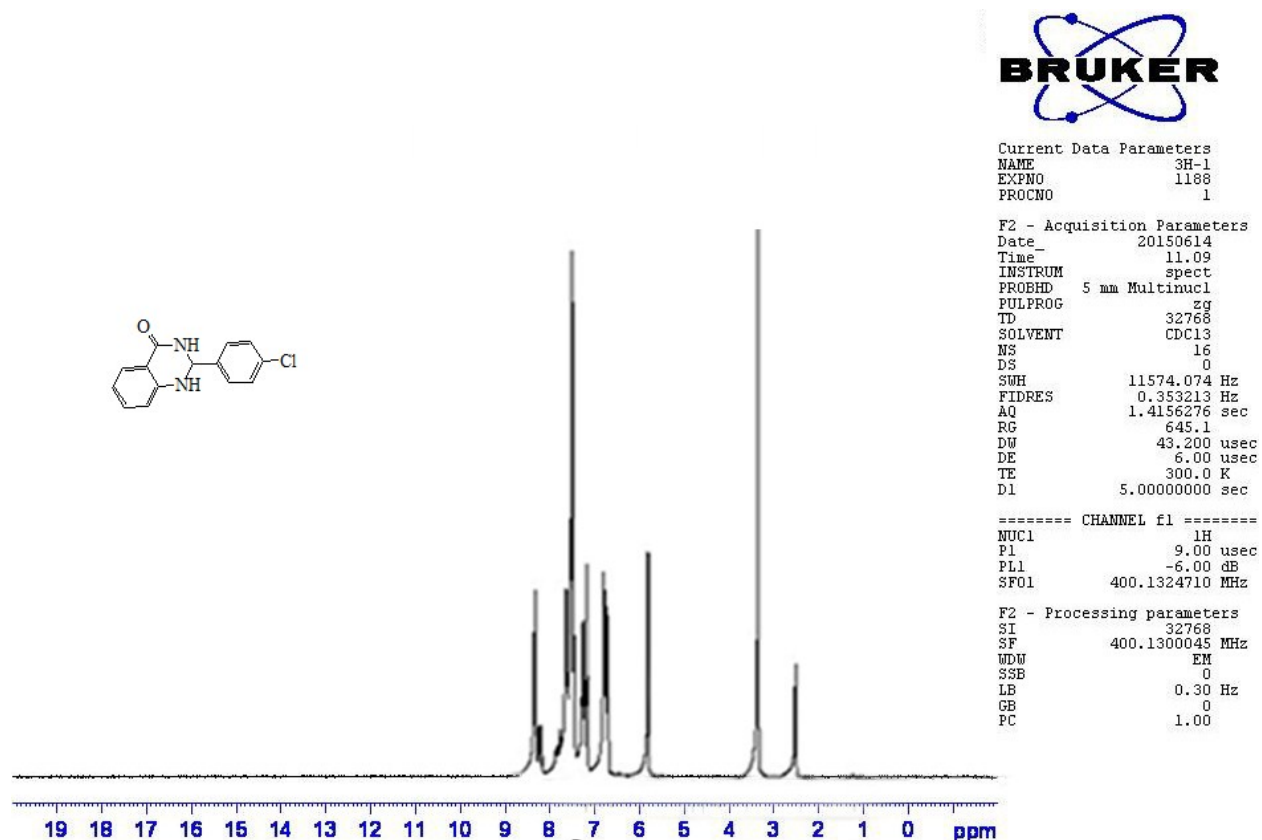

<sup>1</sup>H NMR 1b

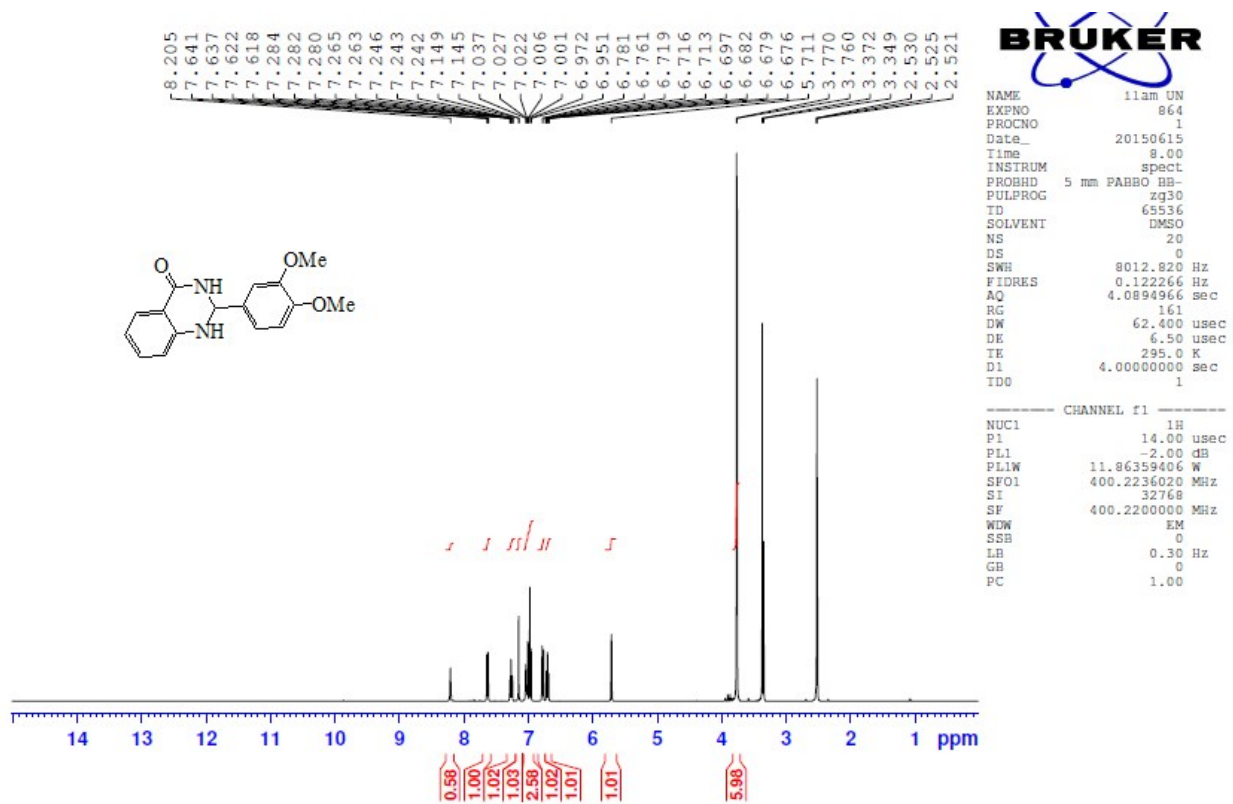

<sup>1</sup>H NMR 1c

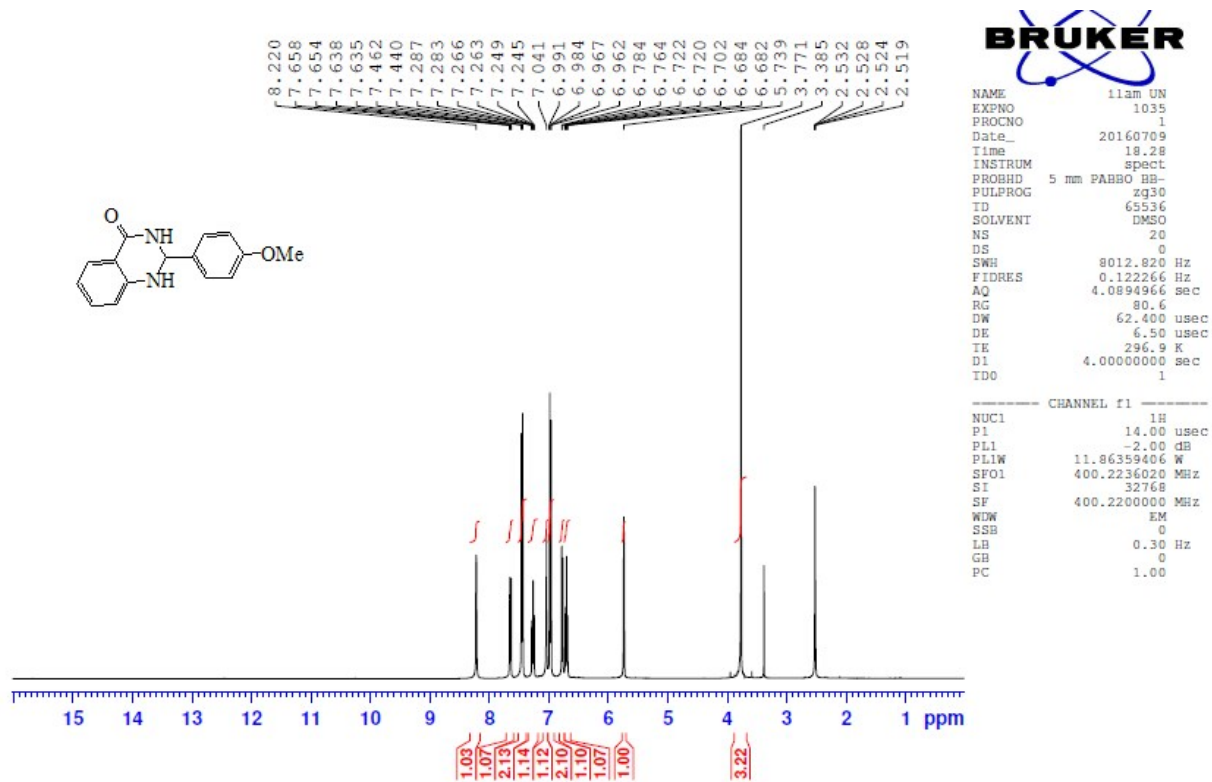

<sup>1</sup>H NMR 1d

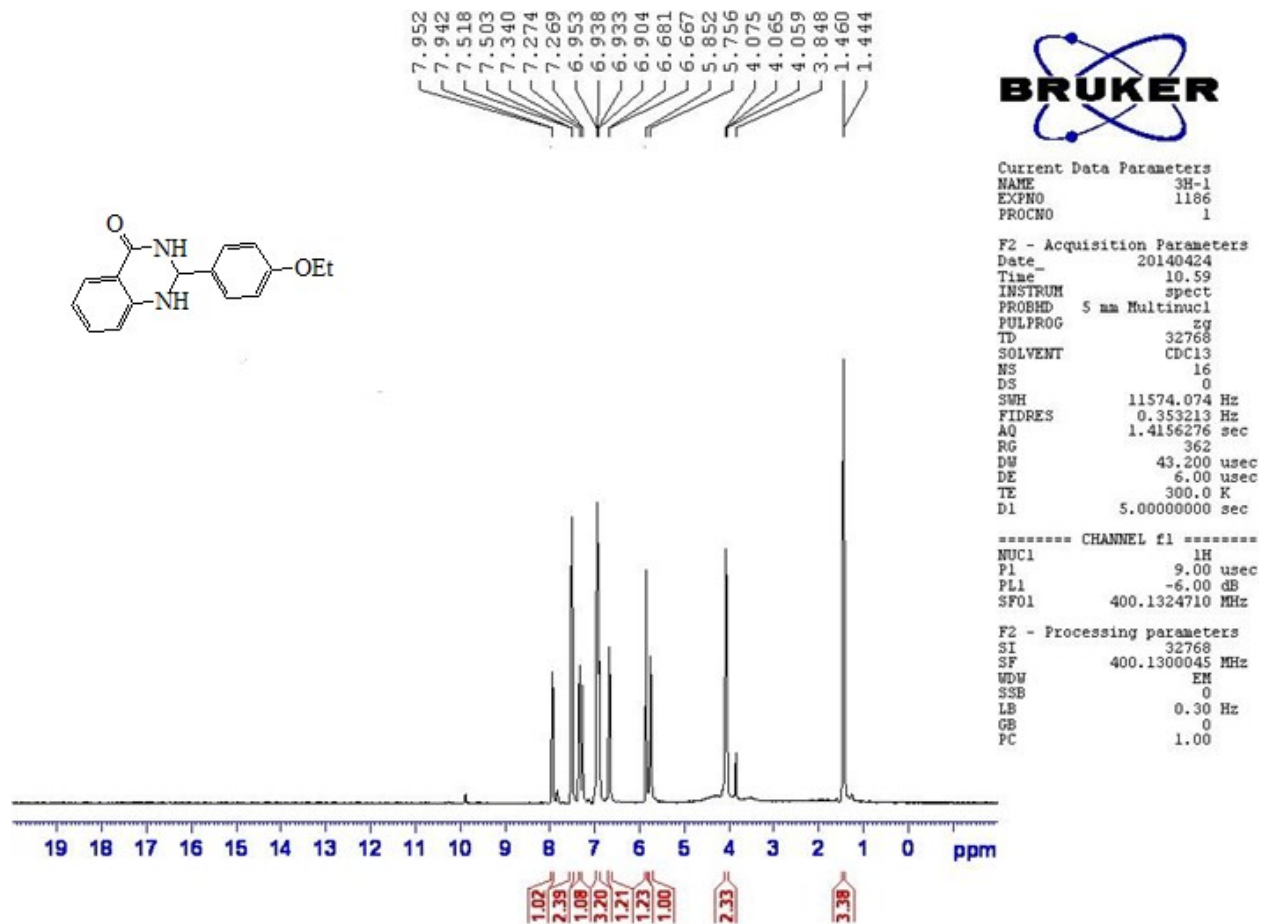

<sup>1</sup>H NMR 1e

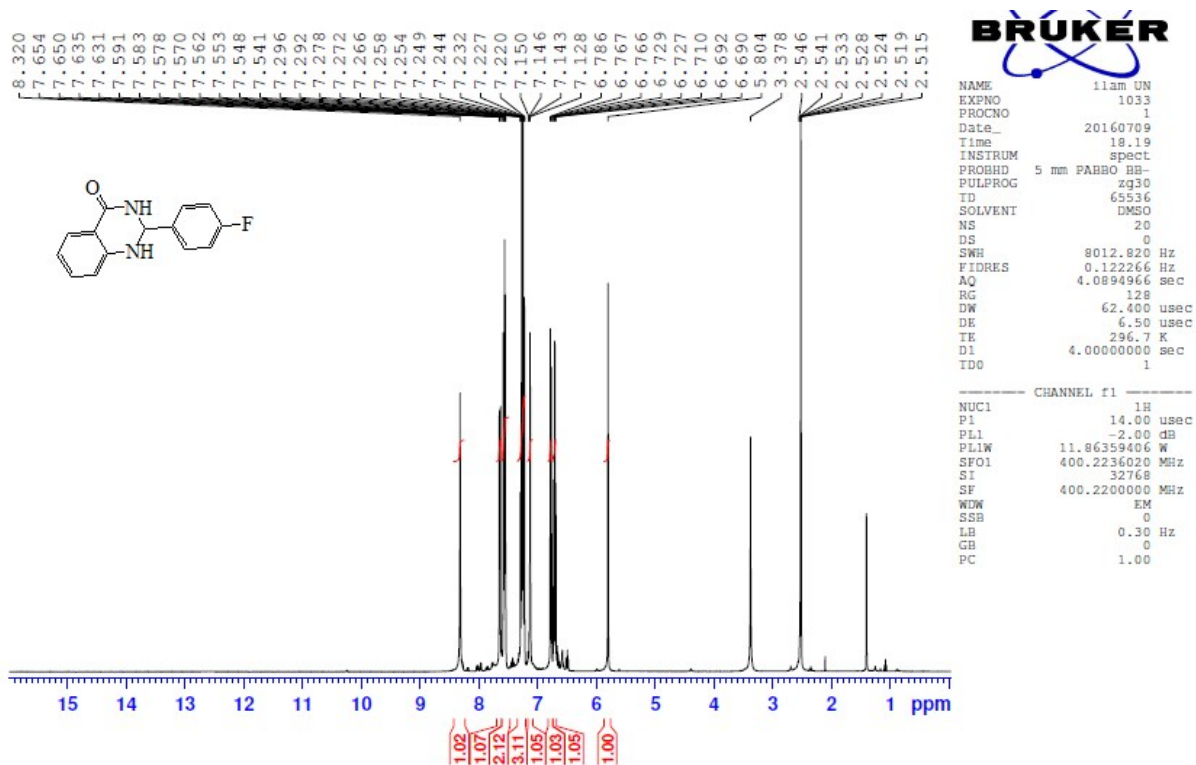



<sup>1</sup>H NMR 1f

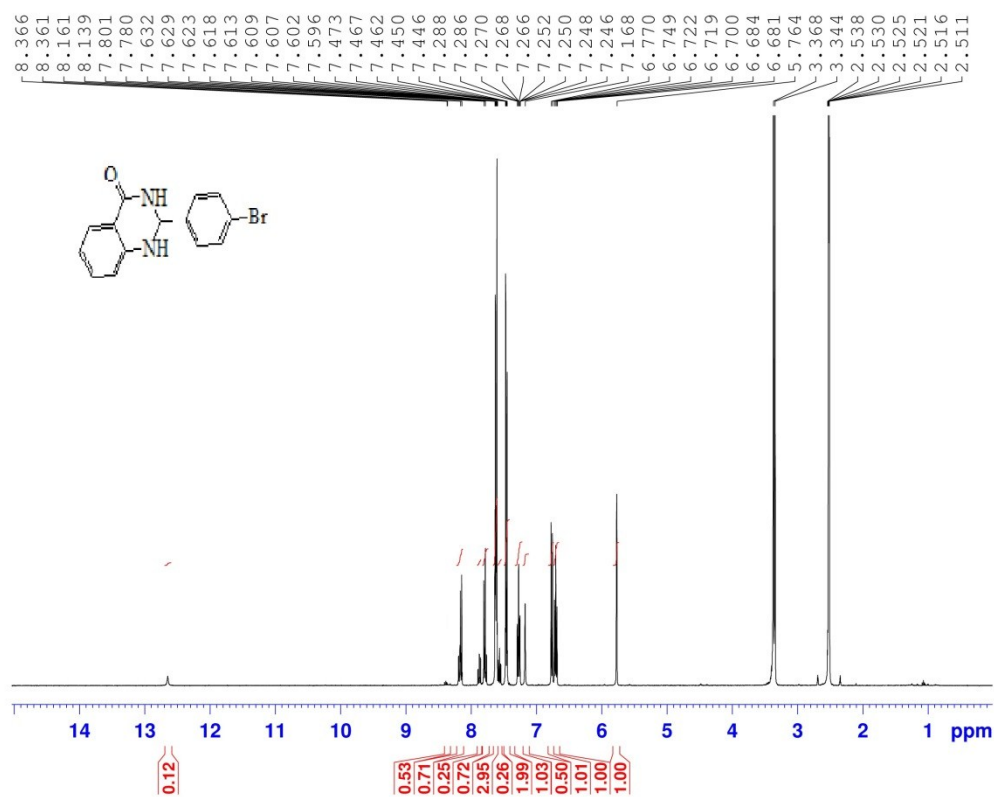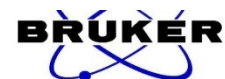

```
NAME      ilam UN
EXPNO     863
PROCNO    1
Date_     20150615
Time      7.55
INSTRUM   spect
PROBHD    5 mm PABBO BB-
PULPROG   zg30
TD         65536
SOLVENT   DMSO
NS         20
DS         0
SWH        8012.820 Hz
FIDRES     0.122266 Hz
AQ         4.0894966 sec
RG         228
DW         62.400 usec
DE         6.50 usec
TE         294.9 K
D1         4.00000000 sec
TD0        1

===== CHANNEL f1 =====
NUC1      1H
P1        14.00 usec
PL1       -2.00 dB
PL1W      11.86359406 W
SFO1      400.2236020 MHz
SI         32768
SF         400.2200000 MHz
WDW        EM
SSB        0
LB         0.30 Hz
GB         0
PC         1.00
```

<sup>1</sup>H NMR 1g

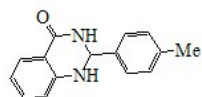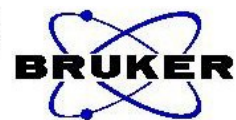

Current Data Parameters  
NAME 3H-1  
EXPNO 1188  
PROCNO 1

F2 - Acquisition Parameters  
Date\_ 20150614  
Time\_ 11.09  
INSTRUM spect  
PROBHD 5 mm Multinucl  
PULPROG zg  
TD 32768  
SOLVENT CDCl3  
NS 16  
DS 0  
SWH 11574.074 Hz  
FIDRES 0.353213 Hz  
AQ 1.4156276 sec  
RG 645.1  
DW 43.200 usec  
DE 6.00 usec  
TE 300.0 K  
D1 5.00000000 sec

----- CHANNEL f1 -----  
NUC1 1H  
P1 9.00 usec  
PL1 -6.00 dB  
SF01 400.1324710 MHz

F2 - Processing parameters  
SI 32768  
SF 400.1300045 MHz  
WDW EM  
SSB 0  
LB 0.30 Hz  
GB 0  
PC 1.00

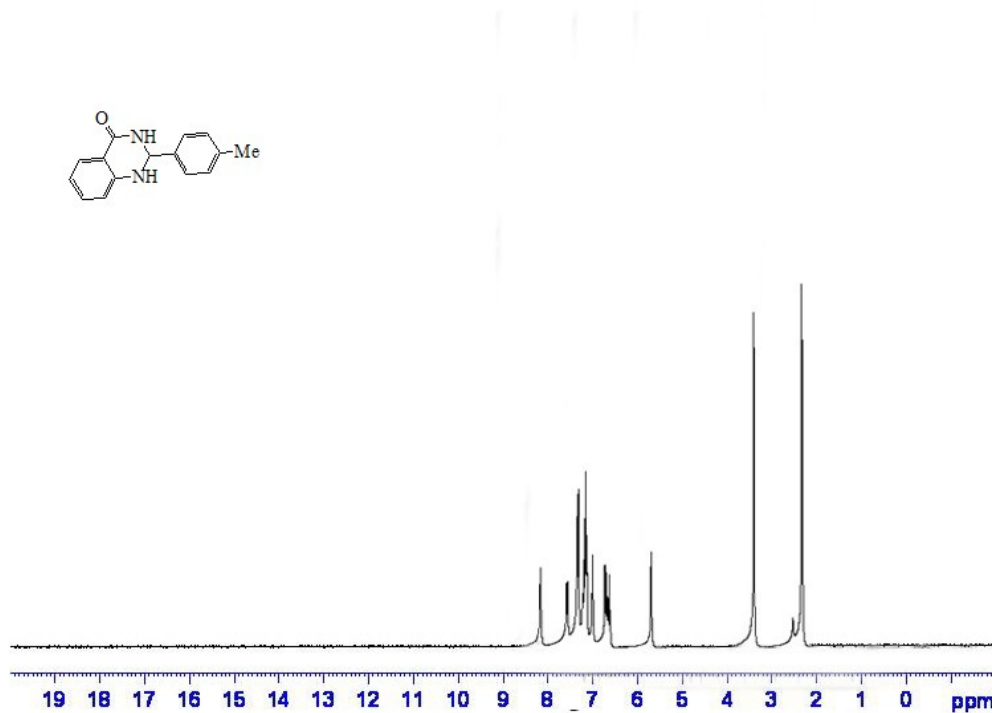

<sup>1</sup>H NMR 1h

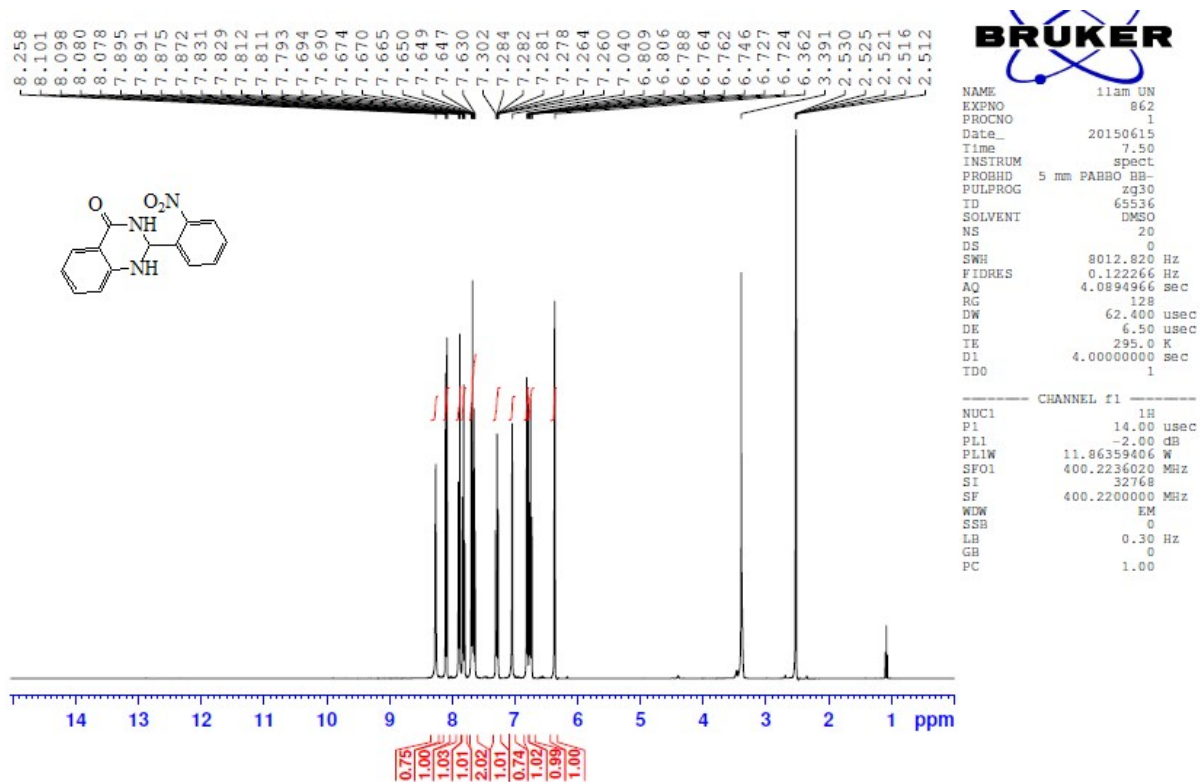

<sup>1</sup>H NMR 1i

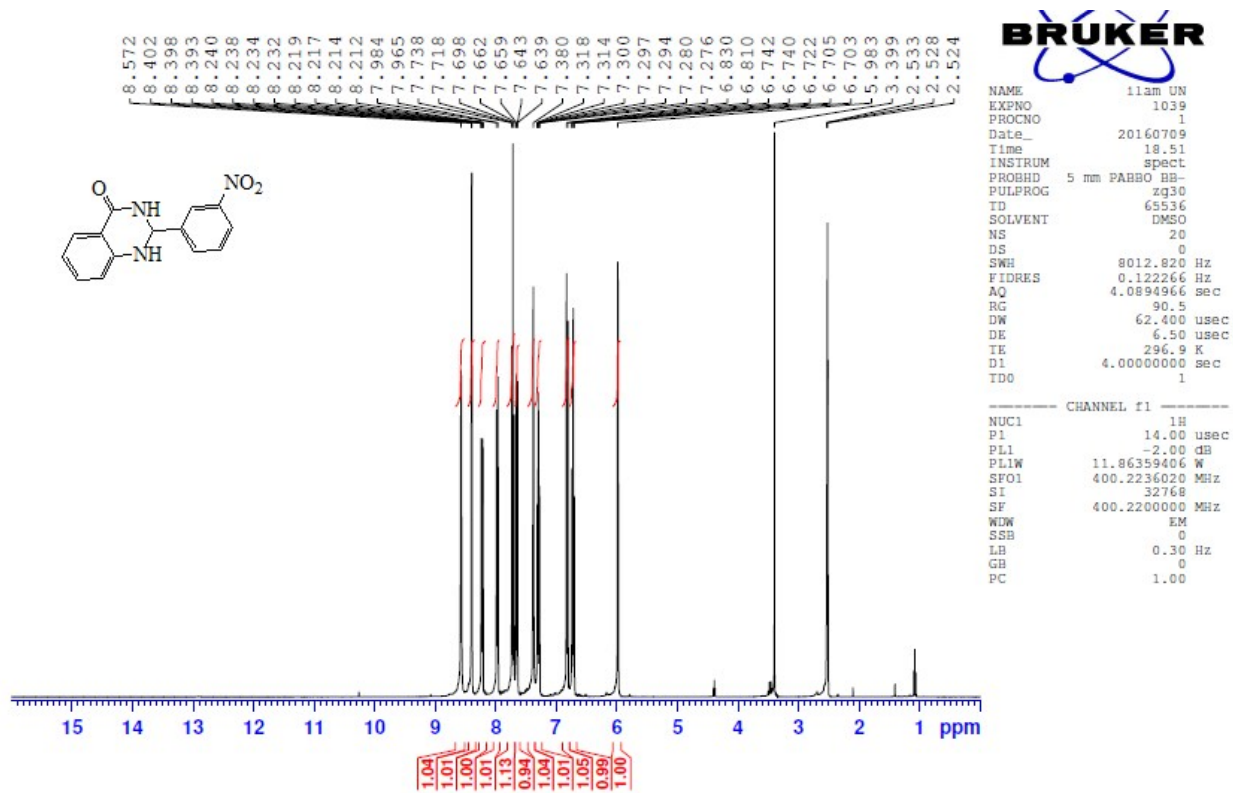

<sup>1</sup>H NMR 2a

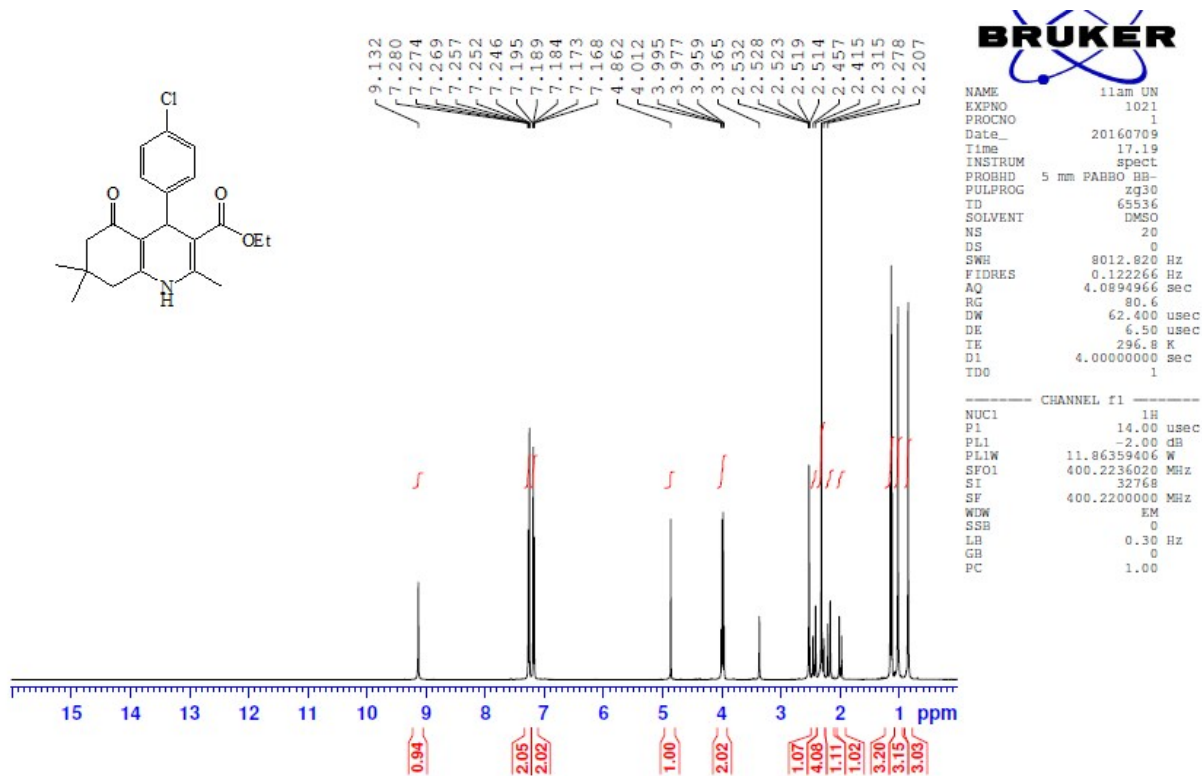

<sup>1</sup>H NMR 2b

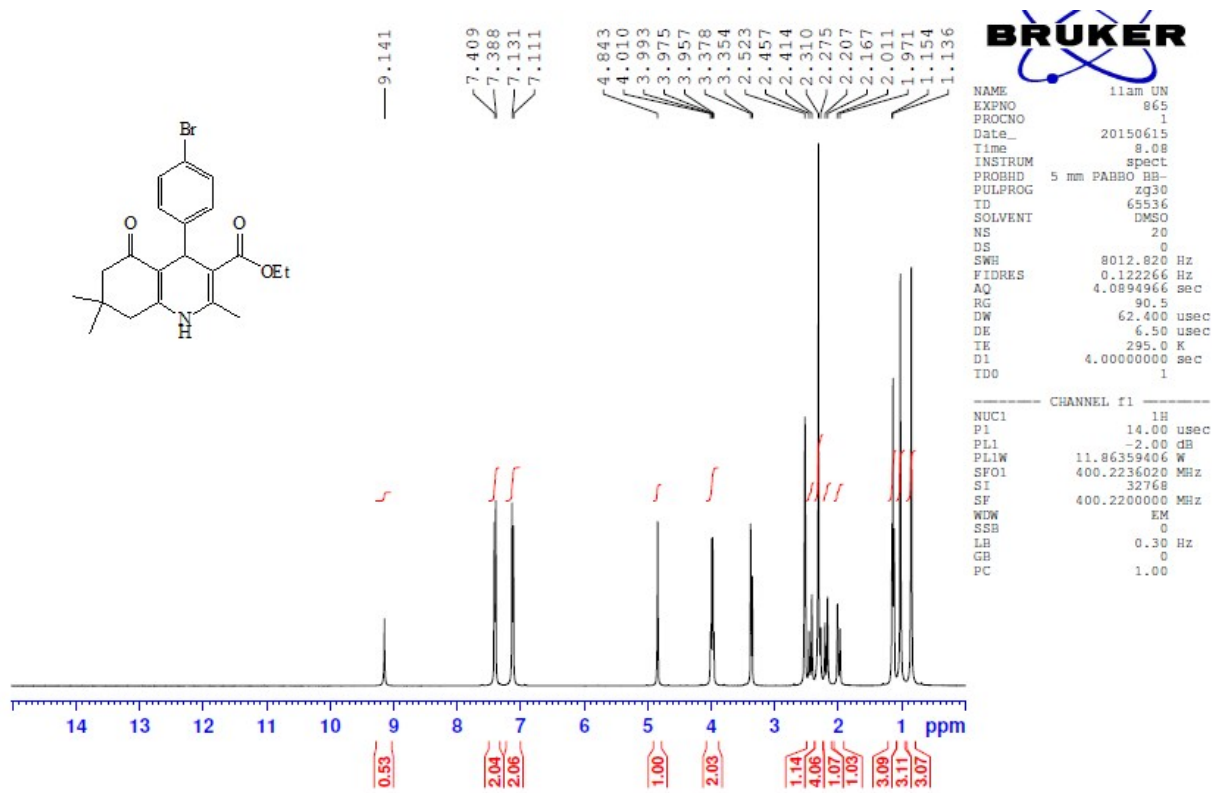

<sup>1</sup>H NMR 2c

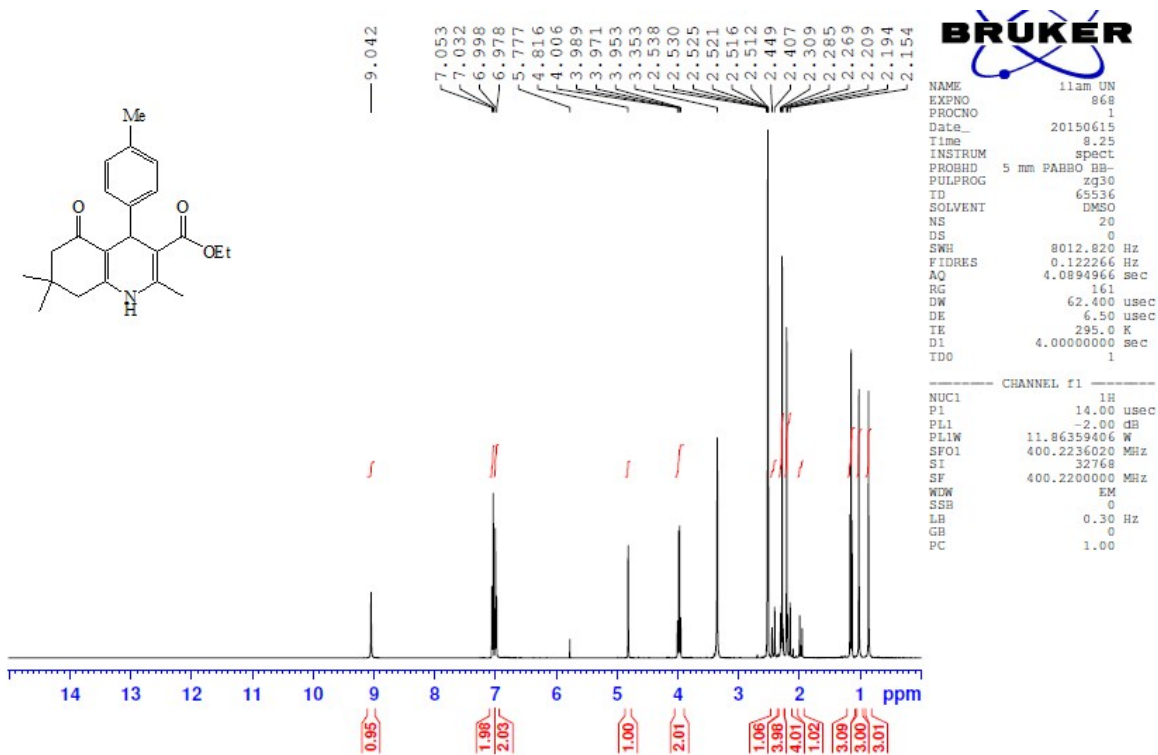

<sup>1</sup>H NMR 2d

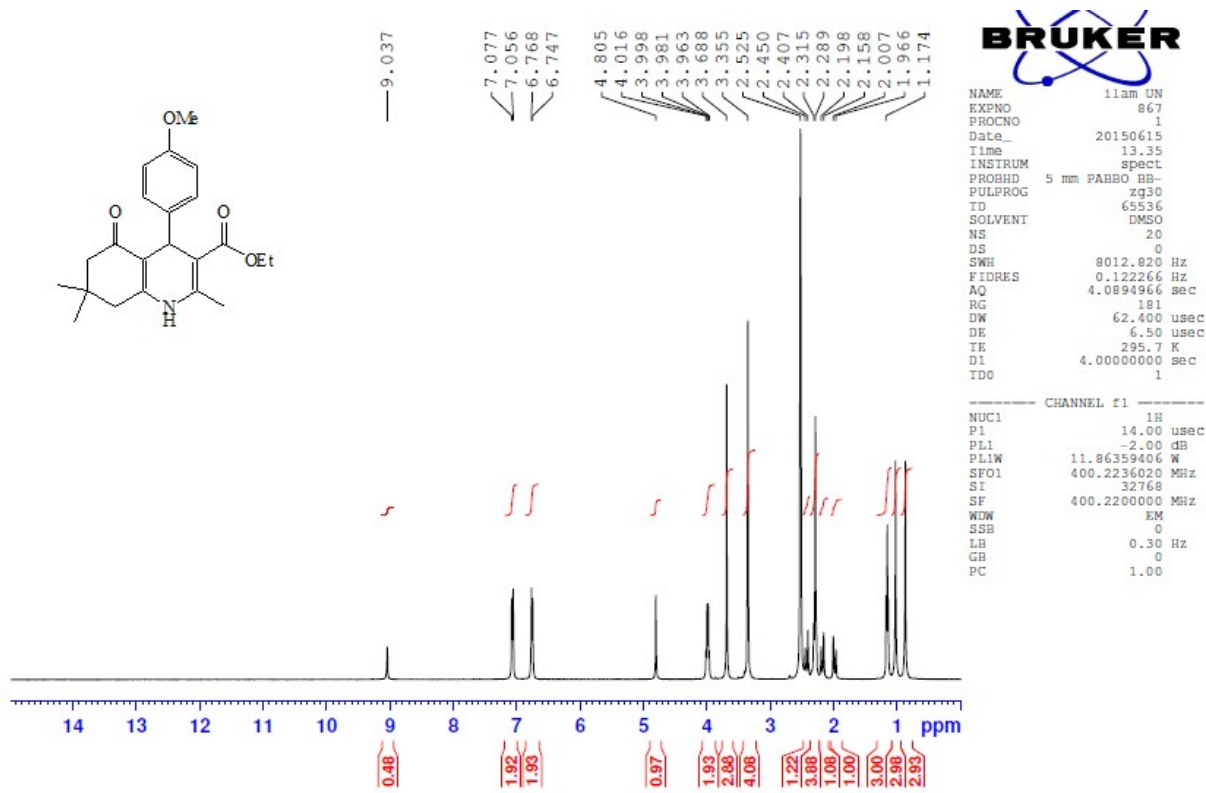



<sup>1</sup>H NMR 2e

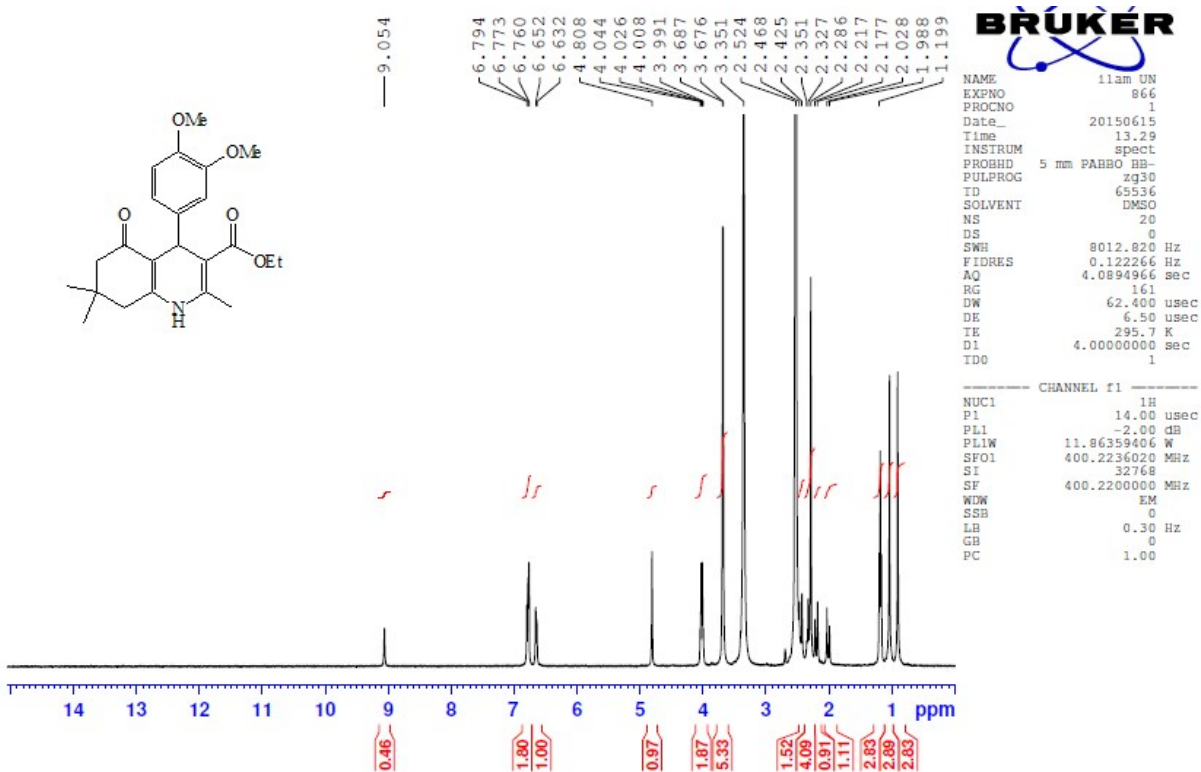

<sup>1</sup>H NMR 2f

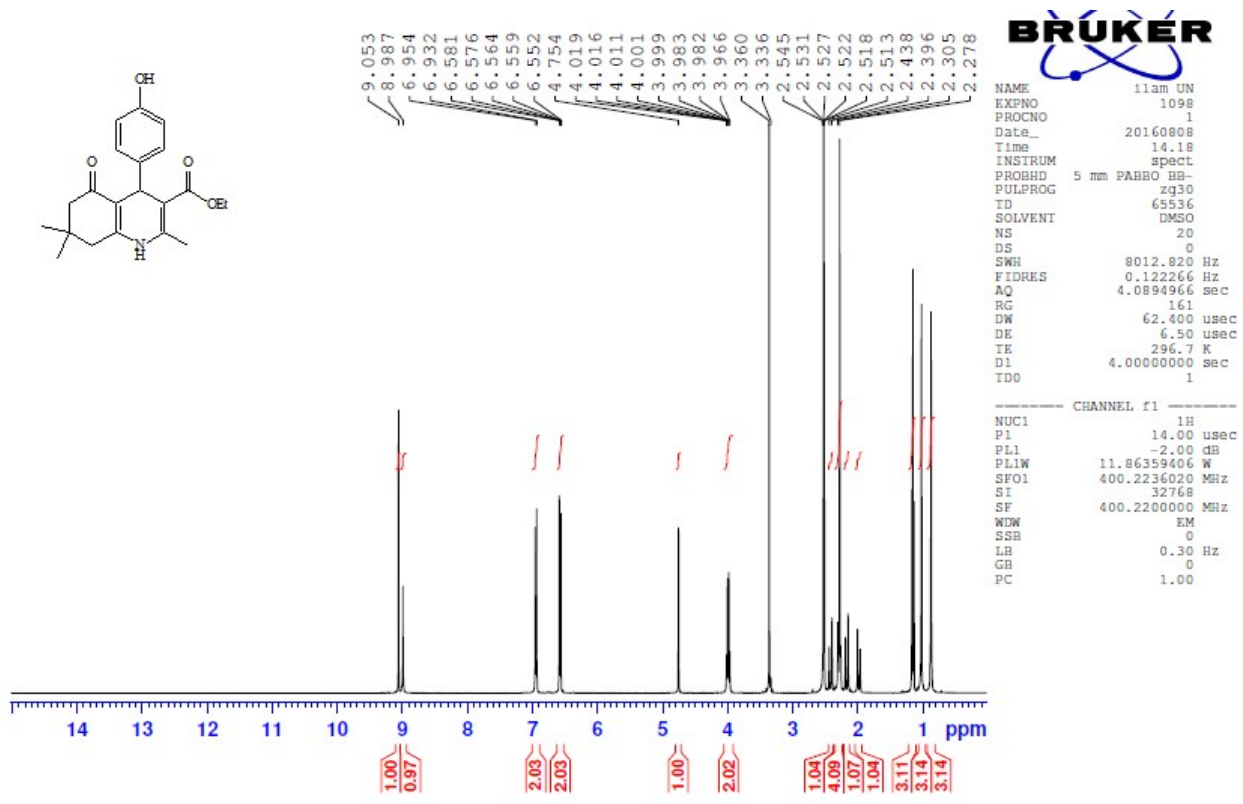

<sup>1</sup>H NMR 2g

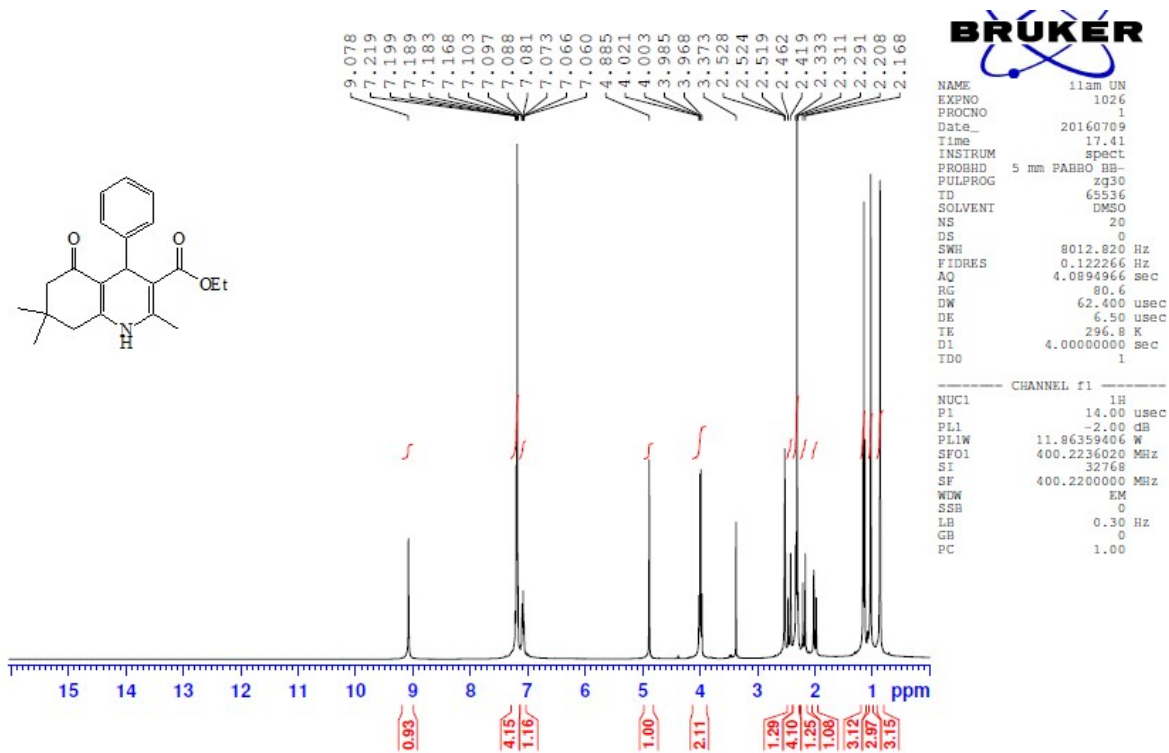

<sup>1</sup>H NMR 2h

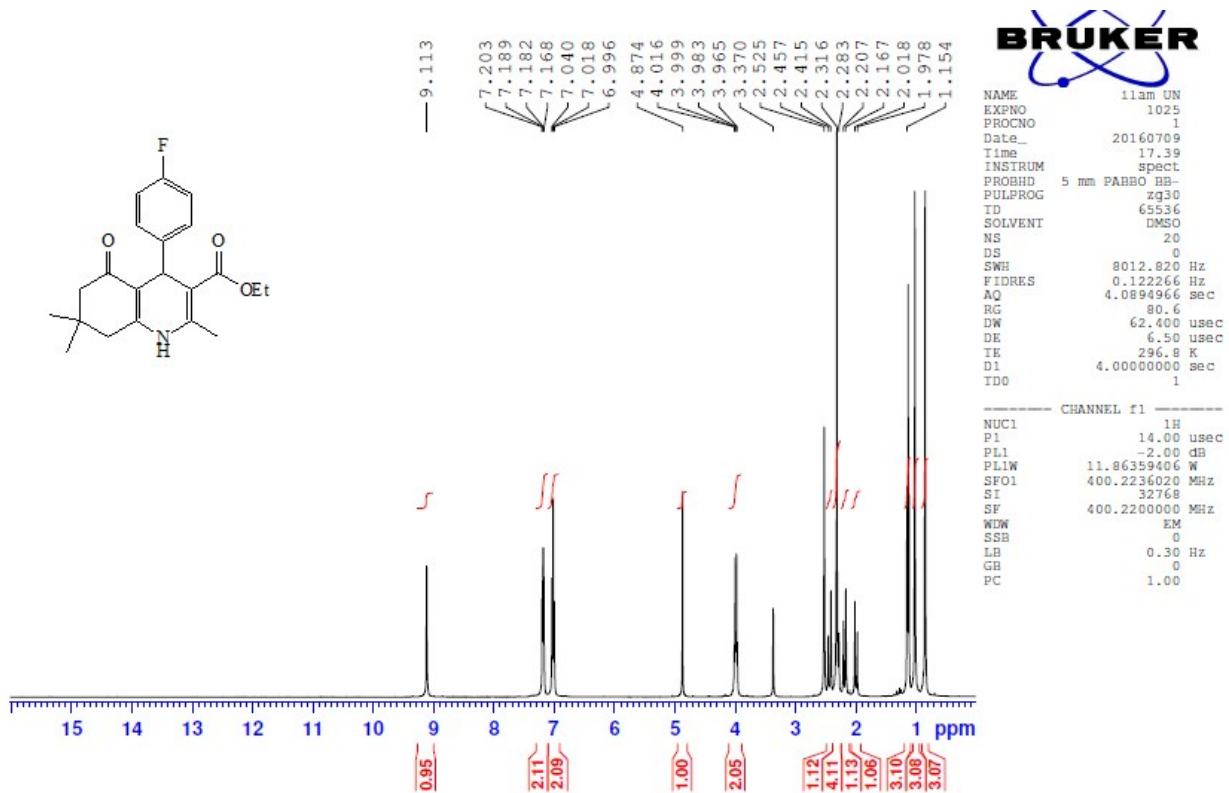

<sup>1</sup>H NMR 2i

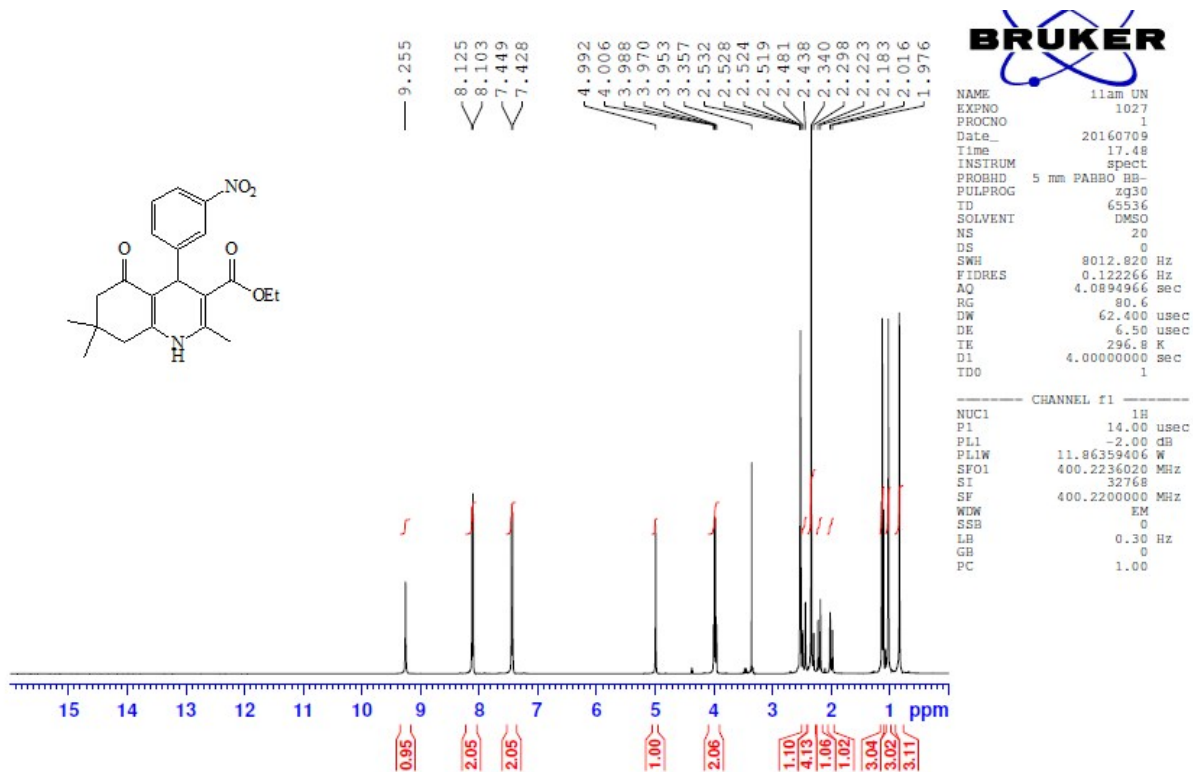

Supplement: c6ra15474c1.pdf [file c6ra15474c1.pdf]
